# Supplementary material for: miR-31-5p Is a LIPUS-Mechanosensitive MicroRNA that Targets HIF-1α Signaling and Cytoskeletal Proteins
Source: MDPI journal article supplement (doi:10.3390/ijms20071569), 2019-03-28
Supplement: s1 [file s1]

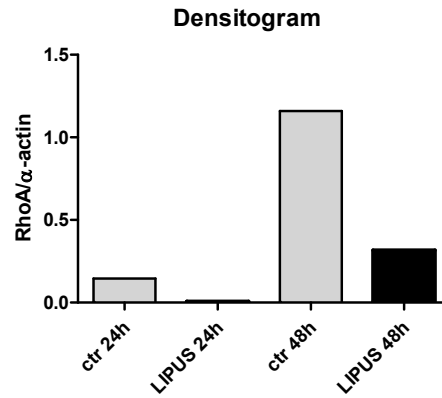

**Figure S1.** Densitogram of RHOA protein expression compared to  $\alpha$ -Actin protein on hMSCs stimulated by LIPUS for 24 h and 48 h and relative control cells.

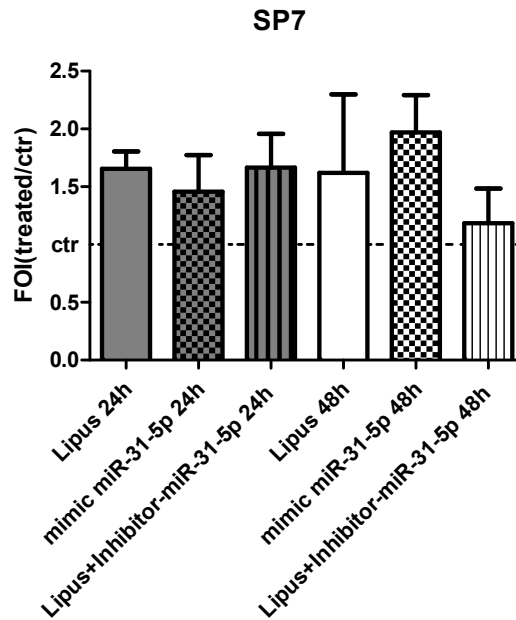

**Figure S2.** Analysis of osteoblast markers expression SP7, after LIPUS stimulation or miR-31-5p mimic or miR-31-5p inhibitor or negative scramble expression after at 24 or 48 h of treatments. Quantitative RT-PCR data are expressed as fold of change (FOI) in gene expression ( $2^{-\Delta\Delta Ct}$ ) occurred in treated groups vs control group. Data reported were analysed by ANOVA Test and represented as Mean  $\pm$  SD. Tukey HSD post hoc comparison test: \*,  $p < 0.05$ ; \*\*,  $p < 0.005$ ; \*\*\*,  $p < 0.0005$ .

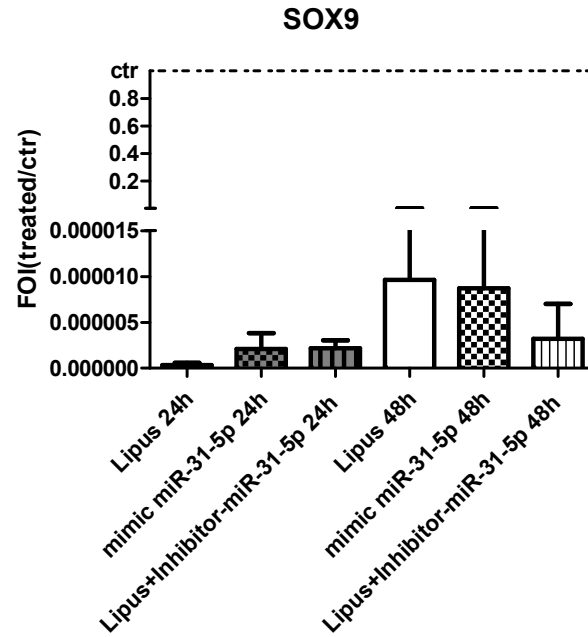

**Figure S3.** Analysis of SOX9 a chondroblast marker, by Quantitative RT-PCR on samples derived by LIPUS stimulation or miR-31-5p mimic or miR-31-5p inhibitor or negative scramble expression after at 24 or 48 h of treatments. Quantitative RT-PCR data are expressed as fold of change (FOI) in gene expression ( $2^{-\Delta\Delta Ct}$ ) occurred in treated groups vs control group. Data reported were analysed by ANOVA Test and represented as Mean  $\pm$  SD. Tukey HSD post hoc comparison test: \*,  $p < 0.05$ ; \*\*,  $p < 0.005$ ; \*\*\*  $p < 0.0005$ .
